# Supplementary material for: Sensitivity of coalescence separation of oil–water emulsions using stainless steel felt enabled by LBL self-assembly and CVD
Source: Royal Society of Chemistry journal article supplement (doi:10.1039/c5ra10415g), 2015-01-01
Supplement: c5ra10415g2.pdf [file c5ra10415g2.pdf]

## Sensitivity of Coalescence Separation of Oil-Water Emulsions Using Stainless Steel Felt Enabled by LBL Self-Assembly and CVD

Xiaoyu Li<sup>a</sup>, Dan Hu<sup>a,b</sup>, Lixia Cao<sup>a</sup> and Chuanfang Yang<sup>a,\*</sup>

<sup>a</sup>Key Laboratory of Green Process and Engineering, National Key Laboratory of Biochemical Engineering, Institute of Process Engineering, Chinese Academy of Sciences, Beijing 100190, China

<sup>b</sup>University of Chinese Academy of Sciences, Beijing 100049, China

\* Corresponding author.

Tel/Fax: +86 10 82544976. E-mail: [cfyang@ipe.ac.cn](mailto:cfyang@ipe.ac.cn)

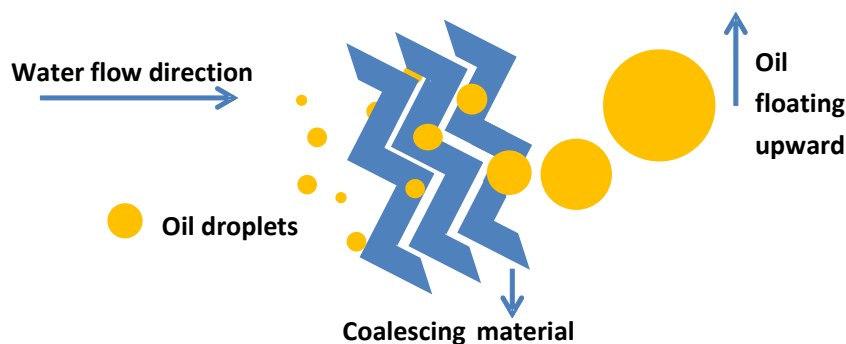

**Figure S1.** Schematic diagram of coalescence process.

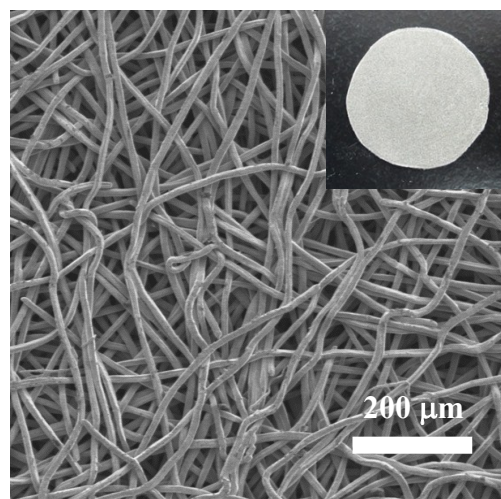

**Figure S2.** SEM image of the blank stainless steel fiber felt; inset is a digital picture of the felt.

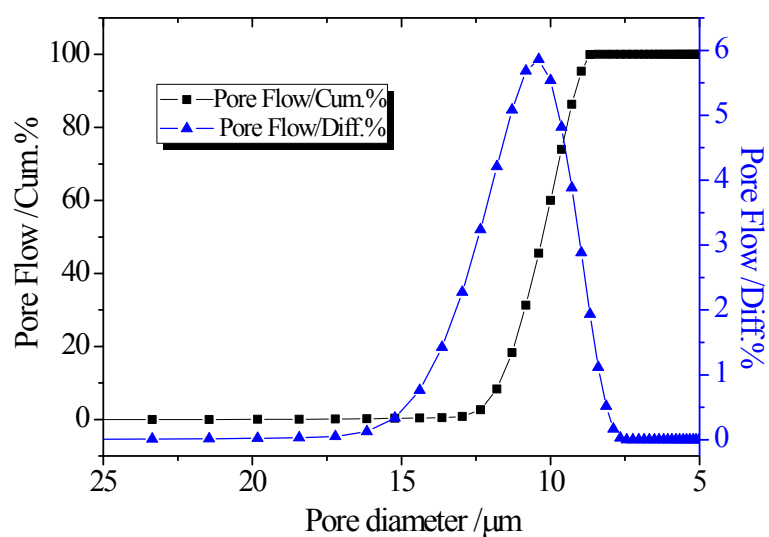

**Figure S3.** Pore size distribution of the blank felt.

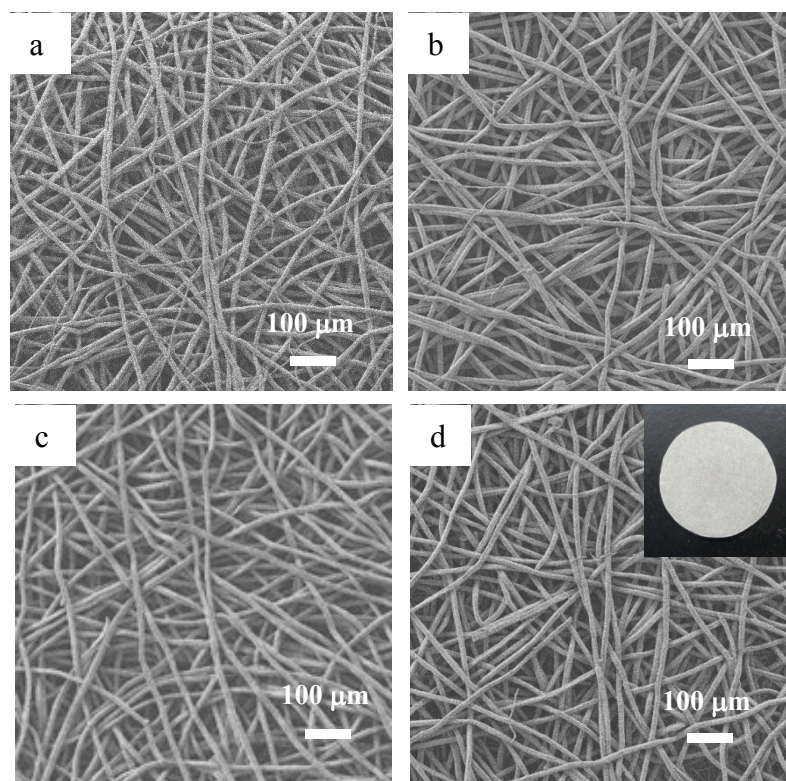

**Figure S4.** SEM images of the felts with (a) 0+1, (b) 1+1, (c) 2+1 and (d) 4+1 particle depositions before hydrophobic modification using CVD; inset is a digital picture of the felt with 4+1 particle deposition.

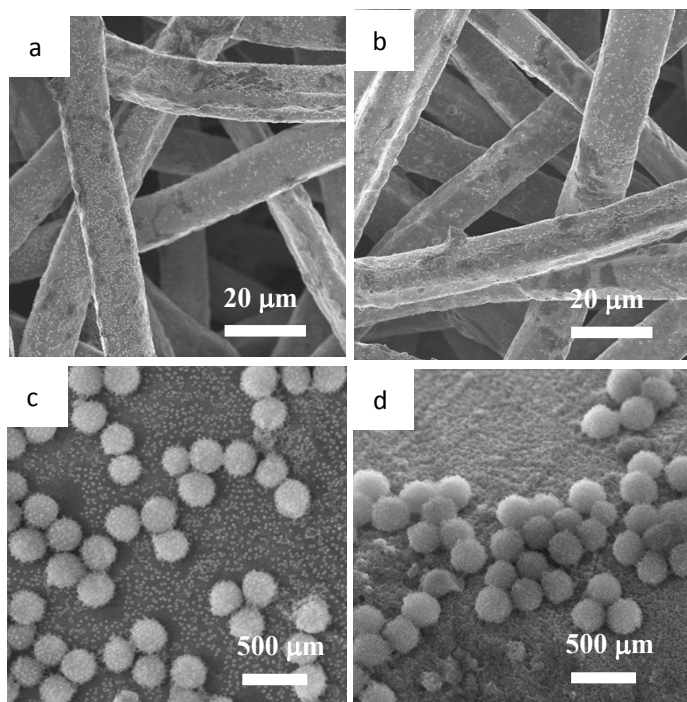

**Figure S5.** SEM images of the felts with 1+1 particle deposition and low level CVD treatment with POTS (a and c) and high level CVD treatment with POTS (b and d).

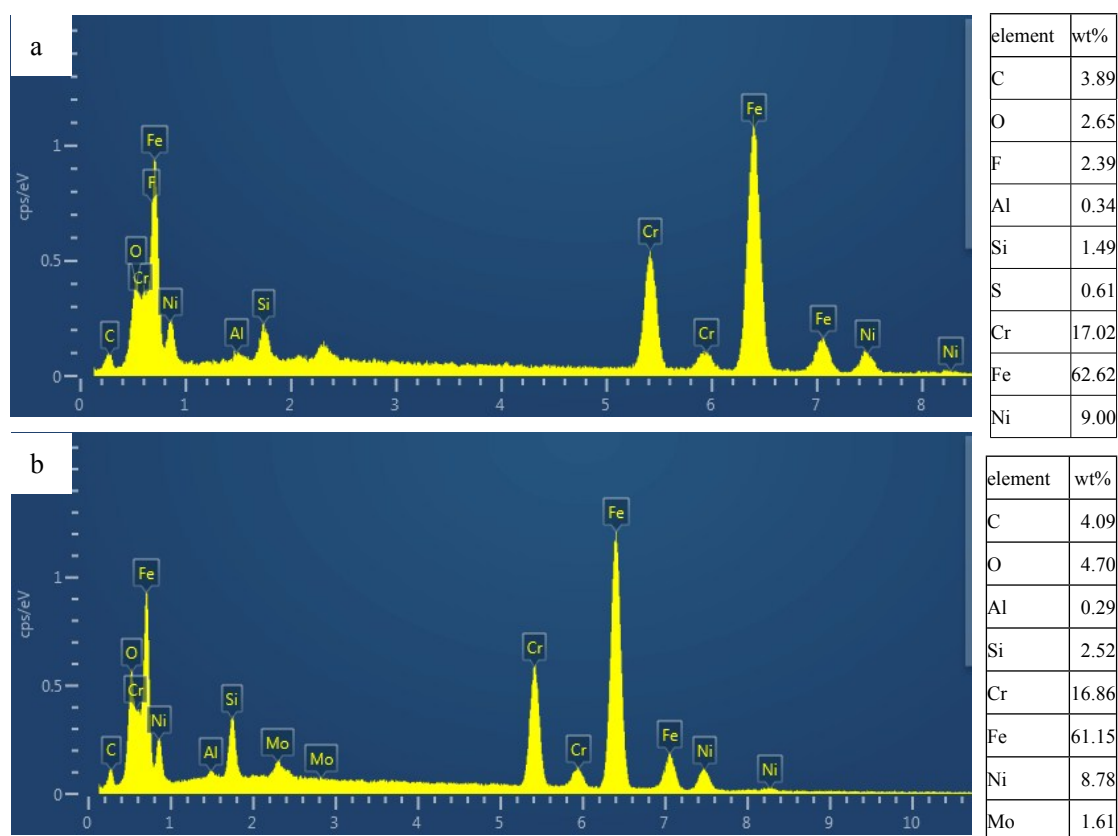

**Figure S6.** EDXS spectra for 1+1 particle deposition and (a) high level CVD treatment with POTS and (b) low level CVD treatment with POTS.

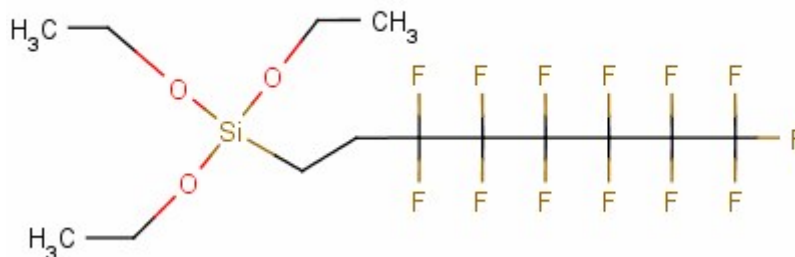

**Figure S7.** Molecular formula of POTS.

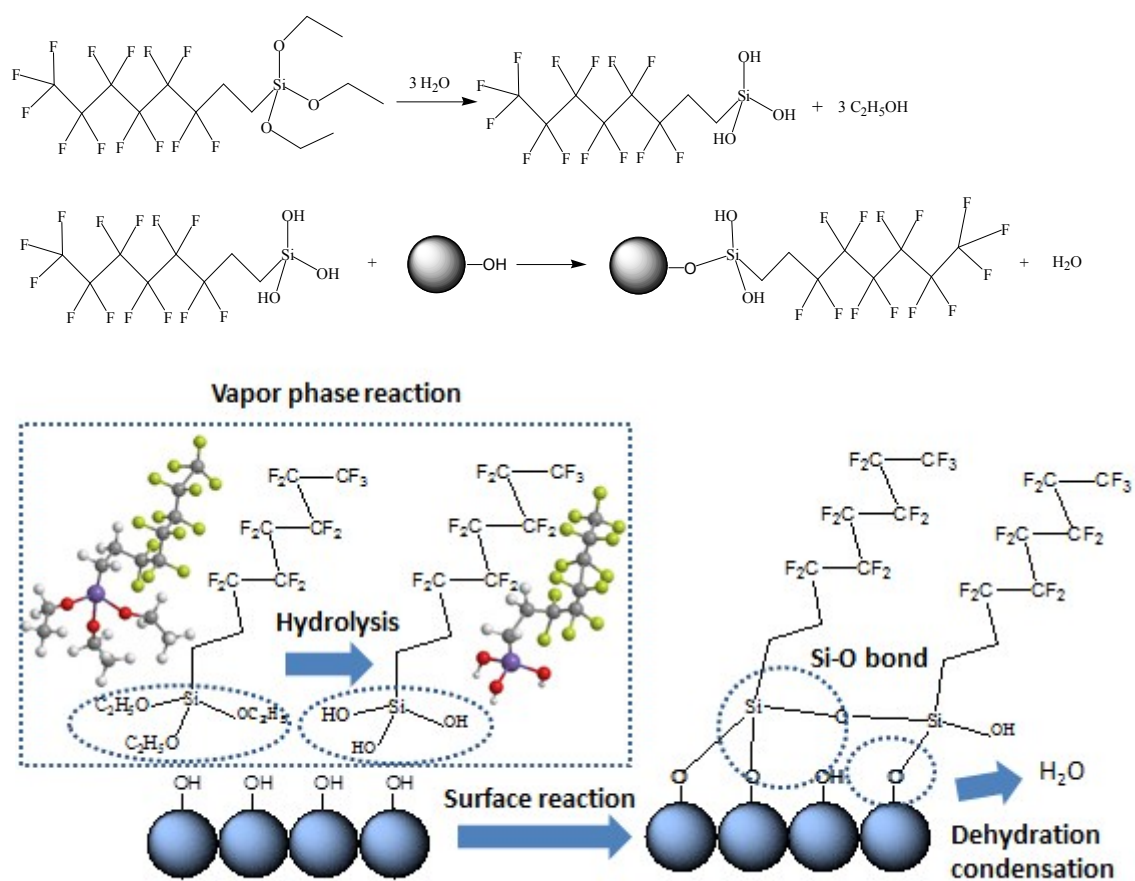

**Figure S8.** Reaction mechanism between POTS and SiO<sub>2</sub>.

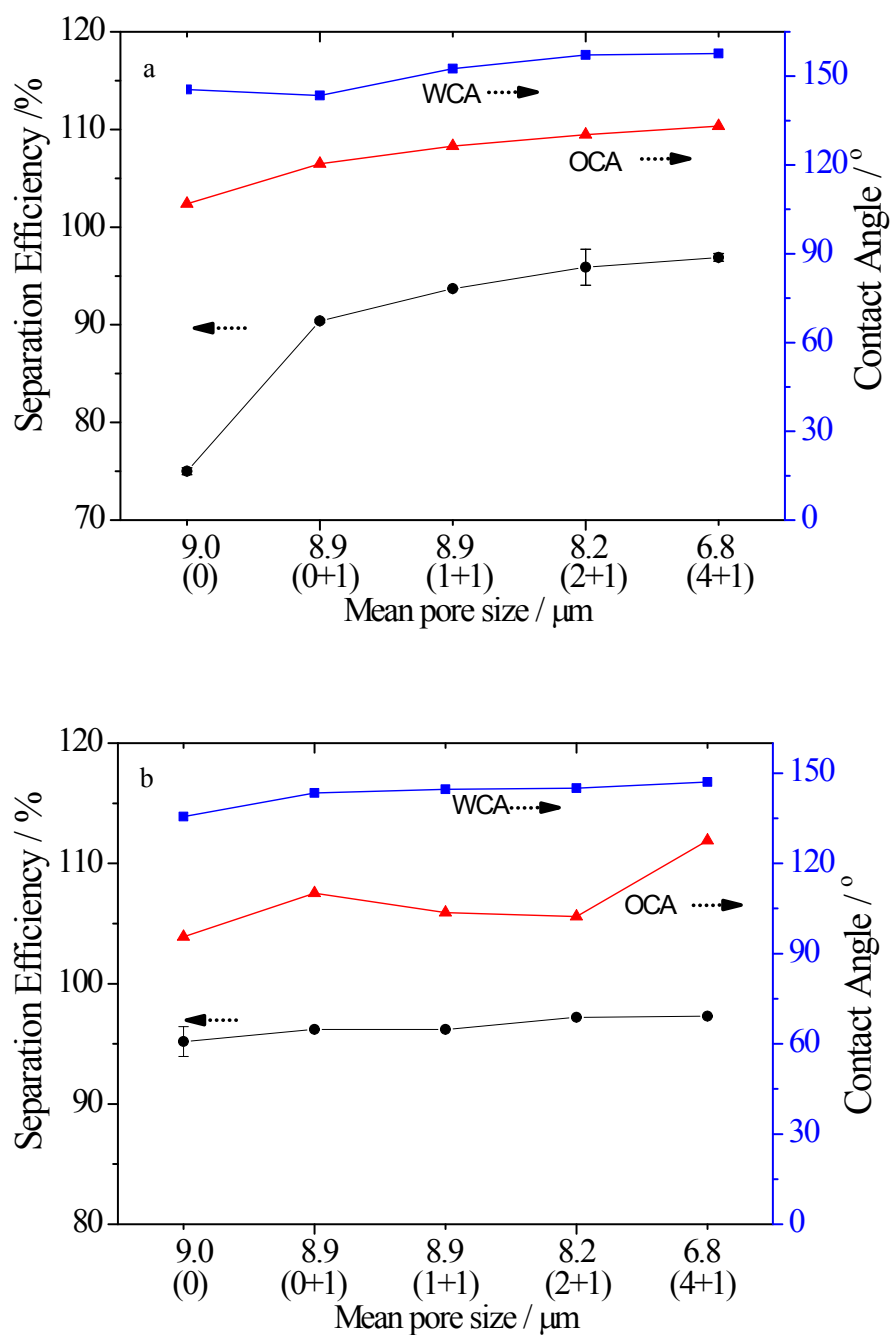

**Figure S9.** Separation efficiency vs. wetting properties of various felts endowed with (a) high level CVD treatment and (b) low level CVD treatment.

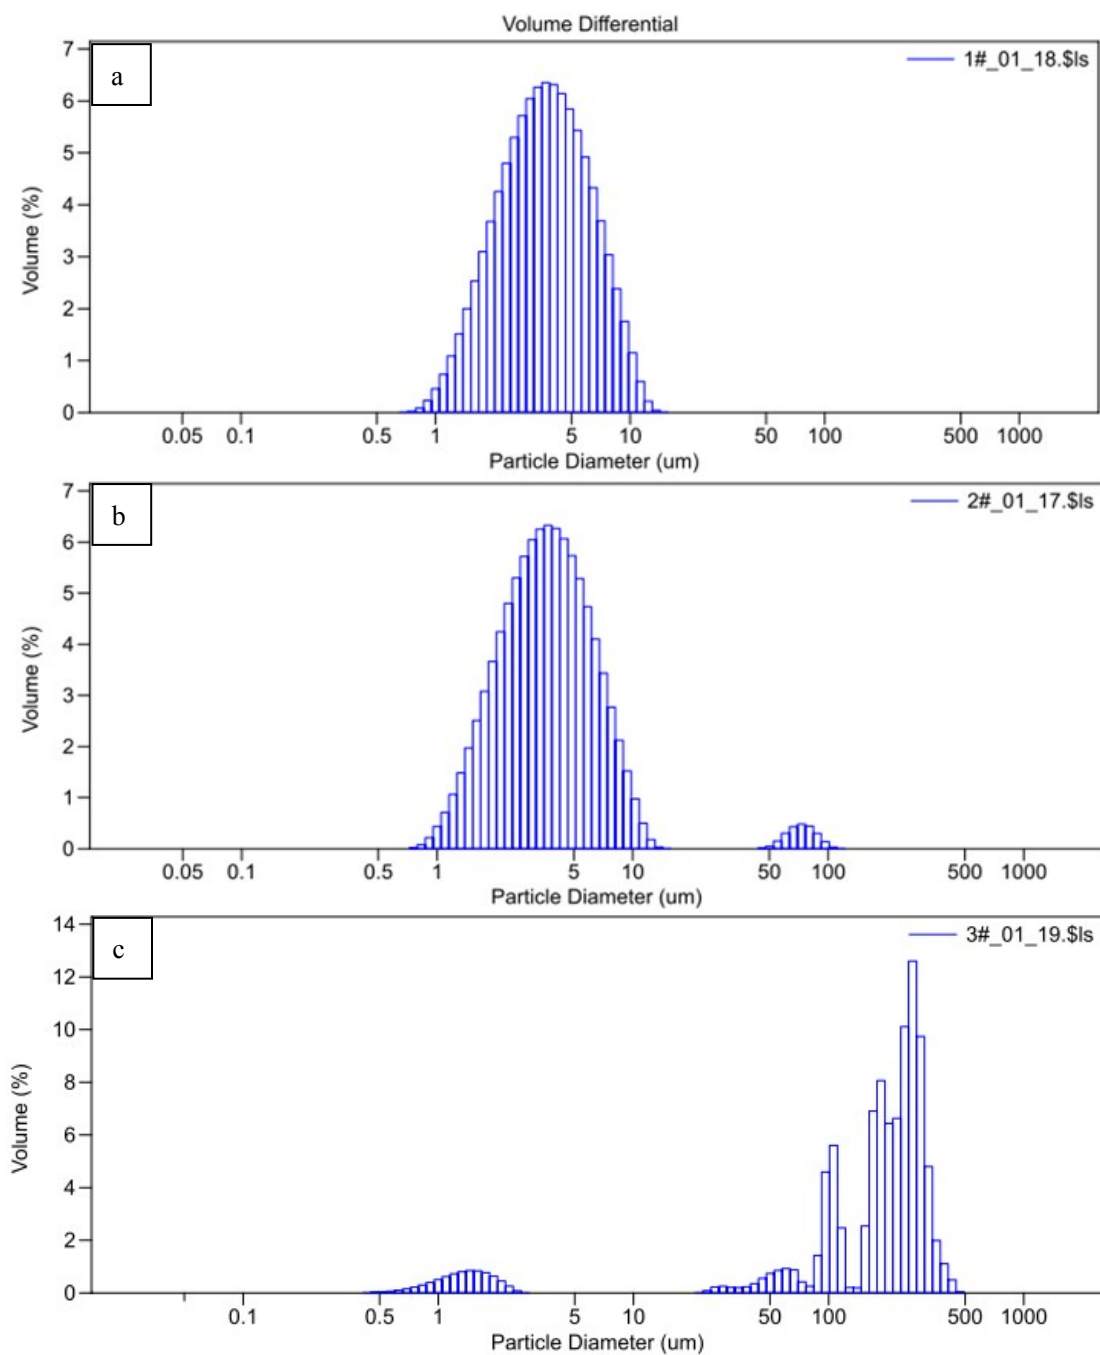

**Figure S10.** The drop size distributions of (a) oil-water emulsion, (b) after passing through the syringe and (c) after passing through the coated filter felt. (n-hexadecane is the oil).



**Table S1.** Si content in deionized water, the ultrasonicated water containing the coated felt and ultrasonicated 2M NaOH solution containing the coated felt. Sonication power 270 W, time 1h.

| Sampled liquid                              | Si content/ppm |
|---------------------------------------------|----------------|
| deionized water                             | 0.00137*       |
| Ultra-sonicated water with the felt         | 0.00851*       |
| Ultra-sonicated NaOH solution with the felt | 2.31828        |

\*out of detection limit
